# Supplementary material
Source: PubMed Central journal article supplement (PMC4010171)
Supplement: Supp_Fig1.pdf [file Supp_Fig1.pdf]

## Supplementary Data

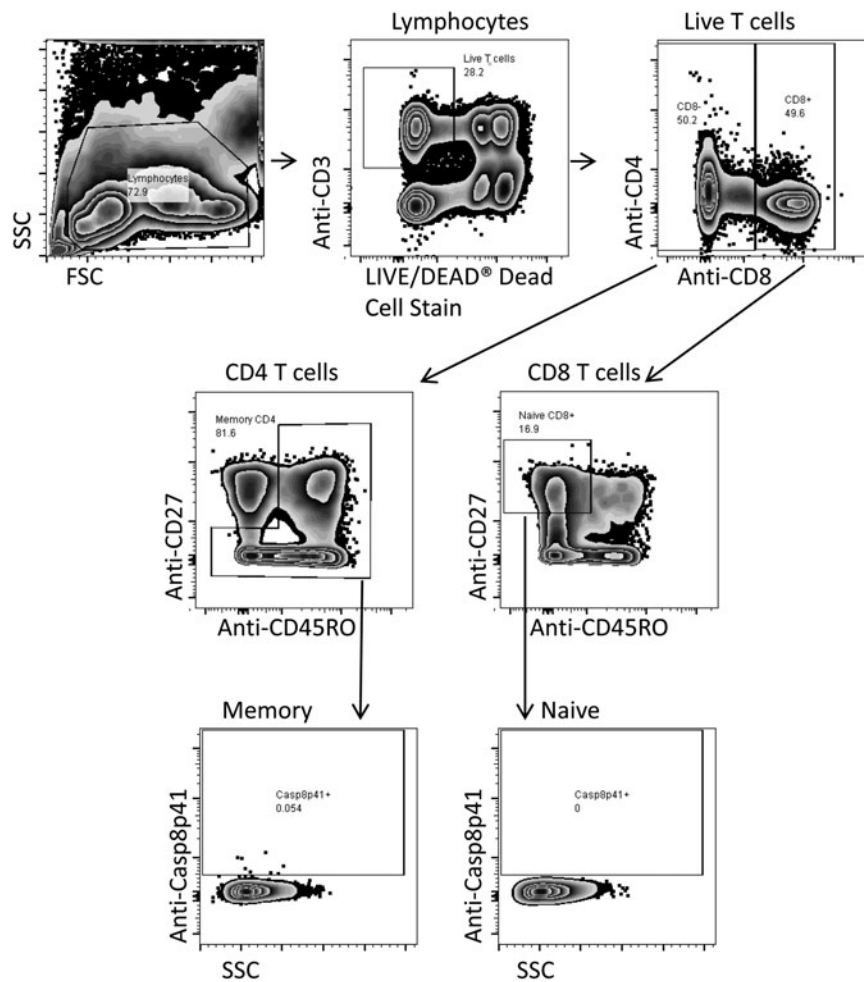

**SUPPLEMENTARY FIG. S1.** Gating strategy for the determination of intracellular Casp8p41 expression by flow cytometry. Depicted is the multicolor gating strategy used to determine the percent of memory CD4 T cells that expresses intracellular Casp8p41. Dead cells were excluded using Aqua LIVE/DEAD Dead Cell Stain (Invitrogen). All live, CD8<sup>-</sup>, CD3 T cells were considered with CD4<sup>+</sup> staining cells to account for HIV-mediated down-regulation of surface CD4 expression. Naive CD8<sup>+</sup> T cells were used as individual Casp8p41 gating controls for memory CD4 T cells. The endpoint is the percent of memory CD4 T cells staining positive for Casp8p41 (0.054% in the depicted representative example).
